# Supplementary material
Source: ML conference proceedings conference paper supplement (https://proceedings.neurips.cc/paper_files/paper/2016/hash/63923f49e5241343aa7acb6a06a751e7-Abstract.html)
Supplement: Supplementary file [file 63923f49e5241343aa7acb6a06a751e7-Supplemental.zip]

# Fast learning rates with heavy-tailed losses

Vu Dinh<sup>1</sup> Lam Si Tung Ho<sup>2</sup> Duy Nguyen<sup>3</sup> Binh T. Nguyen<sup>4</sup>

<sup>1</sup>Program in Computational Biology, Fred Hutchinson Cancer Research Center

<sup>2</sup>Department of Biostatistics, University of California, Los Angeles

<sup>3</sup>Department of Statistics, University of Wisconsin-Madison

<sup>4</sup>Department of Computer Science, University of Science, Vietnam

## Appendix

*Proof of Lemma 3.1.* Define  $q = r - 1$ ;  $p = \frac{r-1}{r-2}$ . Note that  $u$  is non-negative, by Holder's inequality we have

$$P_n u^2 \leq (P_n u)^{1/p} (P_n u^r)^{1/q}$$

which implies

$$\sup_{u \in \mathcal{K}(g_0)} \sqrt{P_n u^2} \leq \left( \sup_{u \in \mathcal{K}(g_0)} P_n u \right)^{\frac{1}{2p}} \left( \sup_{u \in \mathcal{K}(g_0)} P_n u^r \right)^{\frac{1}{2q}}.$$

If we rewrite this inequality as  $y \leq h^{1/p} k^{1/q}$ , then

$$\mathbb{E} y \leq \mathbb{E}[h^{1/p} k^{1/q}] \leq (\mathbb{E} h)^{1/p} (\mathbb{E} k)^{1/q}. \quad (0.1)$$

Since  $Z_i$ 's are independently identically distributed, we have

$$\mathbb{E} \sup_{u \in \mathcal{K}(g_0)} P_n u^r = \mathbb{E} \sup_{u \in \mathcal{K}(g_0)} \frac{u^r(Z_1) + \dots + u^r(Z_n)}{n} \leq \mathbb{E} \frac{1}{n} \sum_{i=1}^n \sup_{u \in \mathcal{K}(g_0)} u^r(Z_i) = \mathbb{E} \sup_{u \in \mathcal{K}(g_0)} u^r(Z_1).$$

This implies

$$\mathbb{E} \sup_{u \in \mathcal{K}(g_0)} \sqrt{P_n u^r} \leq \sqrt{\mathbb{E} \sup_{u \in \mathcal{K}(g_0)} P_n u^r} \leq \left( \mathbb{E} \sup_{u \in \mathcal{K}(g_0)} u^r(Z_1) \right)^{1/2}. \quad (0.2)$$

On the other hand, using the notation  $\bar{P}_n = P_n - P$ , we have

$$\mathbb{E} \sup_{u \in \mathcal{K}(g_0)} P_n u \leq \mathbb{E} \sup_{u \in \mathcal{K}(g_0)} \bar{P}_n u + \sup_{u \in \mathcal{K}(g_0)} P u \leq \mathbb{E} \sup_{u \in \mathcal{K}(g_0)} \bar{P}_n u + \sup_{u \in \mathcal{K}(g_0)} \sqrt{P u^2} \leq \mathbb{E} \sup_{u \in \mathcal{K}(g_0)} \bar{P}_n u + \epsilon. \quad (0.3)$$

Combining (0.1), (0.2) and (0.3), we deduce that

$$\frac{2}{\sqrt{n}} \mathbb{E} D(\mathcal{K}_X) \leq \mathbb{E} \sup_{u \in \mathcal{K}(g_0)} \sqrt{P_n u^2} \leq \left( \epsilon + \mathbb{E} \sup_{u \in \mathcal{K}(g_0)} (P_n - P) u \right)^{\frac{r-2}{2(r-1)}} (2W)^{\frac{r}{2(r-1)}}.$$

□

*Proof of Lemma 3.2.* Using Young's inequality with  $p = \frac{1}{\nu}$ ,  $q = p/(p-1) = 1/(1-\nu)$ , we have

$$ax^\nu = (cax^\nu) \cdot \left( \frac{1}{c} \right) \leq \frac{1}{p} (cax^\nu)^p + \frac{1}{q} \frac{1}{c^q}.$$

We deduce that  $x \leq \alpha x^\nu + b \leq \nu(ca)^{1/\nu} x + (1-\nu)c^{-1/(1-\nu)} + b$ .

If we choose  $c$  such that  $\nu(ca)^{1/\nu} = 1/2$ , or equivalently,  $c = (2\nu)^{-\nu} a^{-1}$ , then

$$\frac{1}{c^{1/(1-\nu)}} = (2\nu)^{\nu/(1-\nu)} a^{1/(1-\nu)}.$$

We deduce that  $x \leq Ca^{1/(1-\nu)} + 2b$ .  $\square$

*Proof of Lemma 3.3.* Define  $\Gamma(x) = x^2/r - (1-\beta)x + \beta\mathcal{C}$ . The minimum value of  $\Gamma(x)$  will be attained at  $x_0 = r(1-\beta)/2 \leq r$  with

$$\Gamma(x_0) = -\frac{r}{4}(1-\beta)^2 + \beta\mathcal{C}.$$

We note that if  $\beta < 1 - 2\sqrt{\mathcal{C}/r}$ , then  $x_0 \geq 1$  and  $\Gamma(x_0) < 0$ . To ensure  $A(l, r, \beta, \mathcal{C}, \alpha) < 0$  for  $l = x_0$ , we need

$$y = \left[ \beta \left( 1 - \frac{\alpha}{2} \right) - \frac{1}{2} \right] x_0 + \beta\mathcal{C} = -\frac{r}{4} [1 - \beta(2 - \alpha)] [1 - \beta] + \beta\mathcal{C} < 0.$$

If  $\alpha \geq 1$ , it is clear that

$$y \leq -\frac{r}{4}(1-\beta)^2 + \beta\mathcal{C} = \Gamma(x_0) < 0.$$

If  $\alpha \leq 1$ , we have  $y \leq -r[1 - \beta(2 - \alpha)]^2/4 + \beta\mathcal{C}$ ; and  $y < 0$  if  $\beta < (1 - 2\sqrt{\mathcal{C}/r})/(2 - \alpha)$ .  $\square$

*Proof of Lemma 3.6.* We have

$$\begin{aligned} \mathbb{E}(\ell(f) - \ell(f^*))^2 &\leq \mathbb{E}\ell(f)^2 + \mathbb{E}\ell(f^*)^2 \\ &\leq 2\mathbb{E}\ell(f)^2 \leq 2[\mathbb{E}\ell(f)^r]^{1/(r-1)} [\mathbb{E}\ell(f)]^{(r-2)/(r-1)} \\ &\leq 2W^{r/(r-1)} [\mathbb{E}\ell(f)]^{(r-2)/(r-1)} \\ &\leq 2W^{r/(r-1)} \left( \frac{\alpha}{M} \right)^{(r-2)/(r-1)} [\mathbb{E}(\ell(f) - \ell(f^*))]^{(r-2)/(r-1)}. \end{aligned}$$

$\square$

*Proof of Lemma 3.7.* Since  $R(f)$  has a unique minimizer at  $f^*$ , there exists  $\alpha > 0$  such that

$$U_\alpha := \{f \in \mathcal{F} : R(f) \leq \frac{\alpha}{\alpha - K} R(f^*)\} \subset U.$$

where  $M$  is the constant defined in Lemma 3.6. Inside  $U_\alpha$ , we have

$$\mathbb{E}(\ell(f) - \ell(f^*)) = R(f) - R(f^*) \geq cd^m(f, g) \geq \frac{c}{L^{m/2}} (\mathbb{E}(\ell(f) - \ell(f^*))^2)^{m/2}. \quad (0.4)$$

By Lemma 3.6 and (0.4), multi-scale Bernstein's condition holds for  $\gamma = ((r-2)/(r-1), 2/m)$ .  $\square$

*Proof of Corollary 3.1.* Recall that  $R(f)$  is strongly convex and  $f^*$  is its unique minimizer, we have

$$\frac{R(f) + R(f^*)}{2} \geq R\left(\frac{f + f^*}{2}\right) + cd^2(f, g) \geq R(f^*) + cd^2(f, g)$$

which implies that

$$\mathbb{E}(\ell(f) - \ell(f^*)) = R(f) - R(f^*) \geq 2cd^2(f, g) \geq \frac{2c}{L} \mathbb{E}(\ell(f) - \ell(f^*))^2.$$

This proves the Bernstein's condition.  $\square$
